# Supplementary material for: Microfluidic laboratories for C. elegans enhance fundamental studies in biology
Source: Royal Society of Chemistry journal article supplement (doi:10.1039/c3ra43758b), 2013-11-27
Supplement: c3ra43758b.pdf [file c3ra43758b.pdf]

**Table 2.** Manipulation techniques: on-chip sorting of *C. elegans*.

| Sorting technique             | Principle                                                                                   | <i>C. elegans</i> population                                       | Selectivity                                                 | Throughput                                                                  | Manner                                 | Chip arrangement / structure                                                   | Technology                               | Application                                                                                      | Picture | References                                        |
|-------------------------------|---------------------------------------------------------------------------------------------|--------------------------------------------------------------------|-------------------------------------------------------------|-----------------------------------------------------------------------------|----------------------------------------|--------------------------------------------------------------------------------|------------------------------------------|--------------------------------------------------------------------------------------------------|---------|---------------------------------------------------|
| <b>Electrotaxis</b>           | DC (3.5–7 V/cm);<br>AC (20 mHz–1 Hz);<br>DC pulse<br>(50 μs, 1 Hz–1 kHz,<br>3 V/cm–12 V/cm) | Worm population<br>(L2–L4 stage<br>larvae, adults, and<br>mutants) | Middle<br>(70–90 %)                                         | Low<br>(4.3±1.0<br>worms/min) and<br>high (78<br>worms/min per load<br>run) | Passive, long-<br>term (~40–60<br>min) | Line-channels with<br>embedded electrodes in<br>inlet and outlet<br>reservoirs | Single PDMS<br>layer                     | Drug screening,<br>age- and size<br>synchronization,<br>movement-based<br>behavioural<br>studies | Fig. 2A | 30-33, 38,<br>52 and 58                           |
| <b>“On-flow”<br/>sorting</b>  | Self-regulated sample<br>loading                                                            | Worm population<br>(larvae and adults)                             | High<br>(94% of adults<br>with 0.2% larva<br>contamination) | High<br>(200 worms/min)                                                     | Passive, long-<br>term                 | Microstructured<br>architecture “smart<br>mazes” or<br>microchambers           | Single PDMS<br>layer                     | Age- and size<br>synchronization,<br>culturing,<br>stimulation                                   | Fig. 3  | 21, 37, 45,<br>50, 55, 68,<br>101, 102<br>and 105 |
| <b>“On-valve”<br/>sorting</b> | On/off valve switching                                                                      | Single worm                                                        | High<br>(96.5%)                                             | Low<br>(50 worms/h) and<br>high (400 worms/h)                               | Active, long-<br>term                  | Two outlets, , positioning<br>area, detection area                             | Single, two,<br>and multi<br>PDMS layers | Stimulation,<br>phenotyping,<br>microsurgery                                                     | Fig. 6C | 28, 47, 51,<br>53, 56, 104<br>and 109             |
| <b>Drop<br/>encapsulation</b> | Worm encapsulation in a<br>drop                                                             | Single worm<br>(synchronized L1<br>stage larvae)                   | Low<br>(60 %<br>in ~10 min)                                 | High                                                                        | Active, long-<br>term (~120<br>min)    | T-junction droplet<br>generator and droplet<br>trap array                      | Single PDMS<br>layer                     | Drug screening,<br>movement-based<br>behavioural<br>studies                                      | Fig. 4  | 23 and 49                                         |

Table 3. Manipulation techniques: on-chip immobilization of *C. elegans*.

| Immobilization technique | Principle                                                                 | <i>C. elegans</i> population                              | Selectivity  | Throughput                         | Manner                                              | Chip arrangement / structure                                                        | Technology                         | Features                                                                                                    | Application                                                 | Picture                   | References                                                                                                               |
|--------------------------|---------------------------------------------------------------------------|-----------------------------------------------------------|--------------|------------------------------------|-----------------------------------------------------|-------------------------------------------------------------------------------------|------------------------------------|-------------------------------------------------------------------------------------------------------------|-------------------------------------------------------------|---------------------------|--------------------------------------------------------------------------------------------------------------------------|
| <b>Mechanical force</b>  | Microchannel narrowing                                                    | Single worm (adults)                                      | High         | High (400 worm/h)                  | Active, long-term                                   | Two fluid outlets, positioning area, and detection area                             | Single, two, and multi PDMS layers | Automatic, repeatable                                                                                       | Movement-based behavioural studies (ageing), drug screening | Fig. 2B, Fig. 6B, Fig. 6C | 11, 13, 14, 16, 17, 20, 22, 24, 28, 32, 35, 36, 37, 46, 47, 51, 56, 59, 60, 63, 64, 67, 68, 94, 95, 98, 102, 104 and 110 |
|                          | Compression (25 psi)                                                      | Single worm (L4 stage larvae and adults)                  | High         | High (few s)                       | Active, short-term (~minutes)                       | Thin deformable membrane                                                            | Two and multi PDMS layers          | Semi- and total immobilization                                                                              | Stimulation                                                 |                           |                                                                                                                          |
|                          | Suction flow (10–20 psi)                                                  | Single worm (L4 stage larvae, adults, and mutants)        | High         | High                               | Active, short-term (~ 5 min)                        | Vacuum-assisted restraint                                                           | Single and multi PDMS layers       | Automatic, repeatable                                                                                       | Phenotyping                                                 |                           |                                                                                                                          |
|                          | Combinations                                                              | Single worm (adults)                                      | High         | High                               | Active, long-term                                   | Vacuum-assisted restraint with either deformable membrane or microchannel narrowing | Two and multi PDMS layers          | Extremely stable                                                                                            | Microsurgery                                                |                           |                                                                                                                          |
| <b>Gel</b>               | Thermo-sensitive polymer (temperature change of ~2 °C)                    | Worm population (L1–L4 stage larvae and adults)           | High         | Low (~45–60 s gel transition time) | Active, long-term                                   | Culturing microfluidic chambers with additional control layer                       | Two PDMS layers                    | No physiological influence, minimal physical deformation, no effect on image quality, automatic, repeatable | Culturing, Movement-based behavioural studies               |                           | 43, 47 and 96                                                                                                            |
| <b>Temperature</b>       | Temperature decrease (~4 °C) or increase (~37 °C)                         | Single worm                                               | High         | High (400 worms/h)                 | Active, short-term (~2 s)                           | Additional control layer above fluid flow channel                                   | Two PDMS layers                    | Automatic, repeatable, worm viability of 100%                                                               | Phenotyping                                                 |                           | 28, 53, 68, 93 and 109                                                                                                   |
| <b>Gas</b>               | CO <sub>2</sub> and N <sub>2</sub> supply through thin membrane (~10 psi) | Single worm (L4 stage larvae and adults)                  | High         | Low (1–2 min/cycle)                | Active, short-term (~1 min), and long-term (1 hour) | Additional layer with closed-end above fluid flow channel                           | Two PDMS layers                    | Total (CO <sub>2</sub> ) and partial (N <sub>2</sub> ) immobilization, automatic                            | Movement-based behavioural studies                          | Fig. 2A                   | 22, 35 and 101                                                                                                           |
| <b>Electrotaxis</b>      | DC (18 V/cm); AC (10 Hz–3 kHz, 3–10 V/cm)                                 | Worm population (L2–L4 stage larvae, adults, and mutants) | High (> 80%) | High                               | Passive, long-term                                  | Line-channels with embedded electrodes in inlet and outlet reservoirs               | Single PDMS layer                  | Partial immobilization, localization, not repeatable                                                        | Movement-based behavioural studies, neuronal study          | Fig. 2A                   | 29–32, 46, 75, 93 and 108                                                                                                |
| <b>Acoustic waves</b>    | Surface acoustic wave                                                     | Worm population (adults)                                  | High         | High                               | Passive, short-term                                 | Microfluidic chip with resonance band of chirped interdigital transducers           | Single PDMS layer                  | Immobilization, possible physiological damage                                                               | Movement-based behavioural studies                          |                           | 62                                                                                                                       |

Table 4. On-chip imaging techniques for *C. elegans*.

| Imaging technique                          | Principle                                                   | Field-of-view          | Resolution                          | Output                                    | Image acquisition / throughput | Detector / illumination                               | Technology                                               | Features                                        | Drawbacks                                           | Application                         | Picture | References                                                                                                                              |
|--------------------------------------------|-------------------------------------------------------------|------------------------|-------------------------------------|-------------------------------------------|--------------------------------|-------------------------------------------------------|----------------------------------------------------------|-------------------------------------------------|-----------------------------------------------------|-------------------------------------|---------|-----------------------------------------------------------------------------------------------------------------------------------------|
| <b>Fluorescence microscopy imaging</b>     | Optical imaging system                                      | Narrow                 | High (pixel accuracy >99.9%)        | Colour image                              | Fast                           | CCD camera, optical system, and filters               | Assembling                                               | Age-independent, repeatable                     | Fluorescent labeling, photodamage, bulky, expensive | Genetic screening, sorting          |         | 7, 11, 14-17, 22, 24, 25, 28, 34-37, 41, 44, 46, 47, 53, 54, 56-58, 60, 63, 66, 68, 93, 94, 95, 96, 98, 101, 102, 105, 107, 108 and 110 |
| <b>Non-fluorescence microscopy imaging</b> | Optical imaging system                                      | Narrow                 | High                                | Colour image                              | Fast                           | CCD camera and optical system                         | Assembling                                               | Label free, age-independent, repeatable         | Bulky, expensive, limited information about sample  | Behavioural phenotyping, monitoring |         | 7-10, 13, 17, 18, 21-23, 25, 26, 29, 30, 31-35, 38, 39, 42, 43, 45, 47, 49, 50-52, 55, 62, 95, 96, 101, 102, 105 and 107                |
| <b>Contact optofluidic</b>                 | Lensless                                                    | Wide                   | High (0.9 $\mu\text{m}$ )           | Colour image                              | High (40 worms/min)            | CCD sensor, coherent light source, and aperture       | Single PDMS layer on imaging sensor                      | Portable, low power consumption                 | Dependence on sample orientation                    | Monitoring                          | Fig. 5A | 70 and 71                                                                                                                               |
| <b>Shadow imaging</b>                      | Lensless                                                    | Wide (3.2 mm x 2.5 mm) | Low (>10 $\mu\text{m}$ )            | Black-and-white image                     | Fast                           | CMOS sensor, coherent light source, and metal grid    | Polycarbonate microchambers with polyester film and grid | Portable, low power consumption                 | Age-dependant, mechanical alignment                 | Monitoring                          | Fig. 5A | 69                                                                                                                                      |
| <b>Digital holography</b>                  | Lensless                                                    | Wide (>24 mm)          | High (2.2 $\mu\text{m}$ )           | Colour and monochrome                     | Slow (1-4 s)                   | CMOS sensor, spatially incoherent light, and aperture | Sample plane on printed circuit board (PCB)              | Low power consumption                           | Age-dependant, no real-time monitoring              | Monitoring, neuronal study          | Fig. 5A | 72-75                                                                                                                                   |
| <b>Micro-electrofluidic grids</b>          | Electrical resistance change of grid's intersection regions | 24 x 24 grids          | 30 $\mu\text{m}$ x 30 $\mu\text{m}$ | Pseudo colour, grayscale and binary image | High (174 Hz readout)          | Two layers of microelectrode arrays                   | Standard photolithography                                | Portable, cost-effective, low power consumption | Age-dependant, not repeatable                       | Drug screening                      | Fig. 5B | 40                                                                                                                                      |
